# Supplementary figures and images for: A dynamic clamp protocol to artificially modify cell capacitance
Source: eLife journal article supplement (doi:10.7554/elife.75517), 2022-04-01

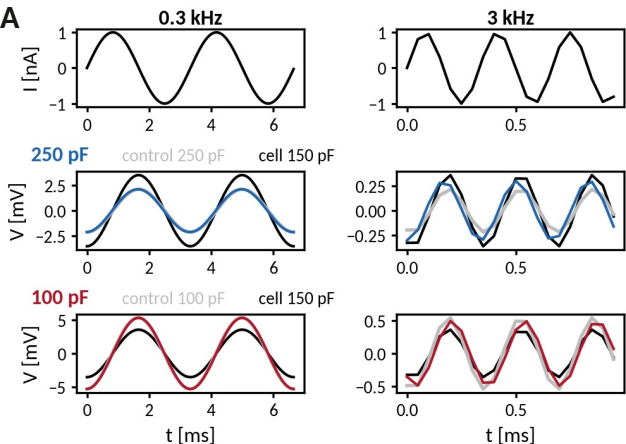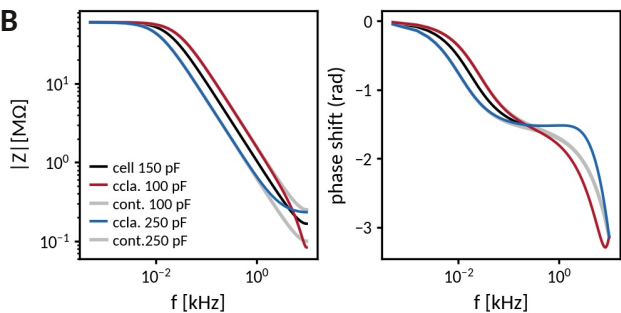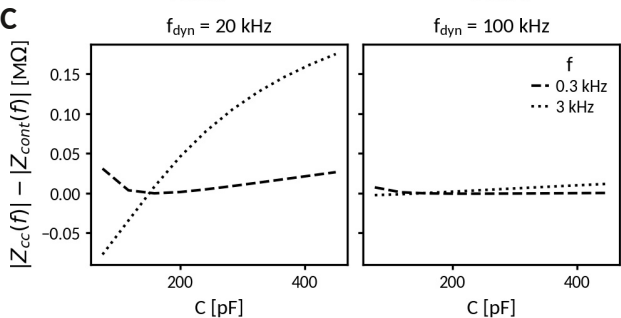

Supplement: supp [file elife-75517-supp-v1.zip]
